# Supplementary material for: Association between coronary heart disease and cardiometabolic index: A study from NHANES 1999-2018
Source: Research Square preprint supplement (doi:10.21203/rs.3.rs-7021969/v1), 2025-09-10
Supplement: Supplementary file 1 [file ec8025838390b93d205d0469.docx]

**Association between coronary heart disease (CHD) and cardiometabolic index (CMI): a study from NHANES 1999-2018**

**Context:**

**Supplementary Figure 1** Decision curve analysis (DCA). The blue line indicates the net benefit of the predictive model. The green line indicates that the predictive model was not used.

**Supplementary Figure 2** Calibration curves. Solid lines indicate bias-corrected predictions, gray dashed lines indicate apparent predictions and black dashed lines indicate ideal predictions.

**Supplementary Table 1** Lasso regression analysis results (log () = -5.2127).

**Supplementary Table 2** Diagnostic efficacy of CMI and the constructed prediction model for coronary heart disease.


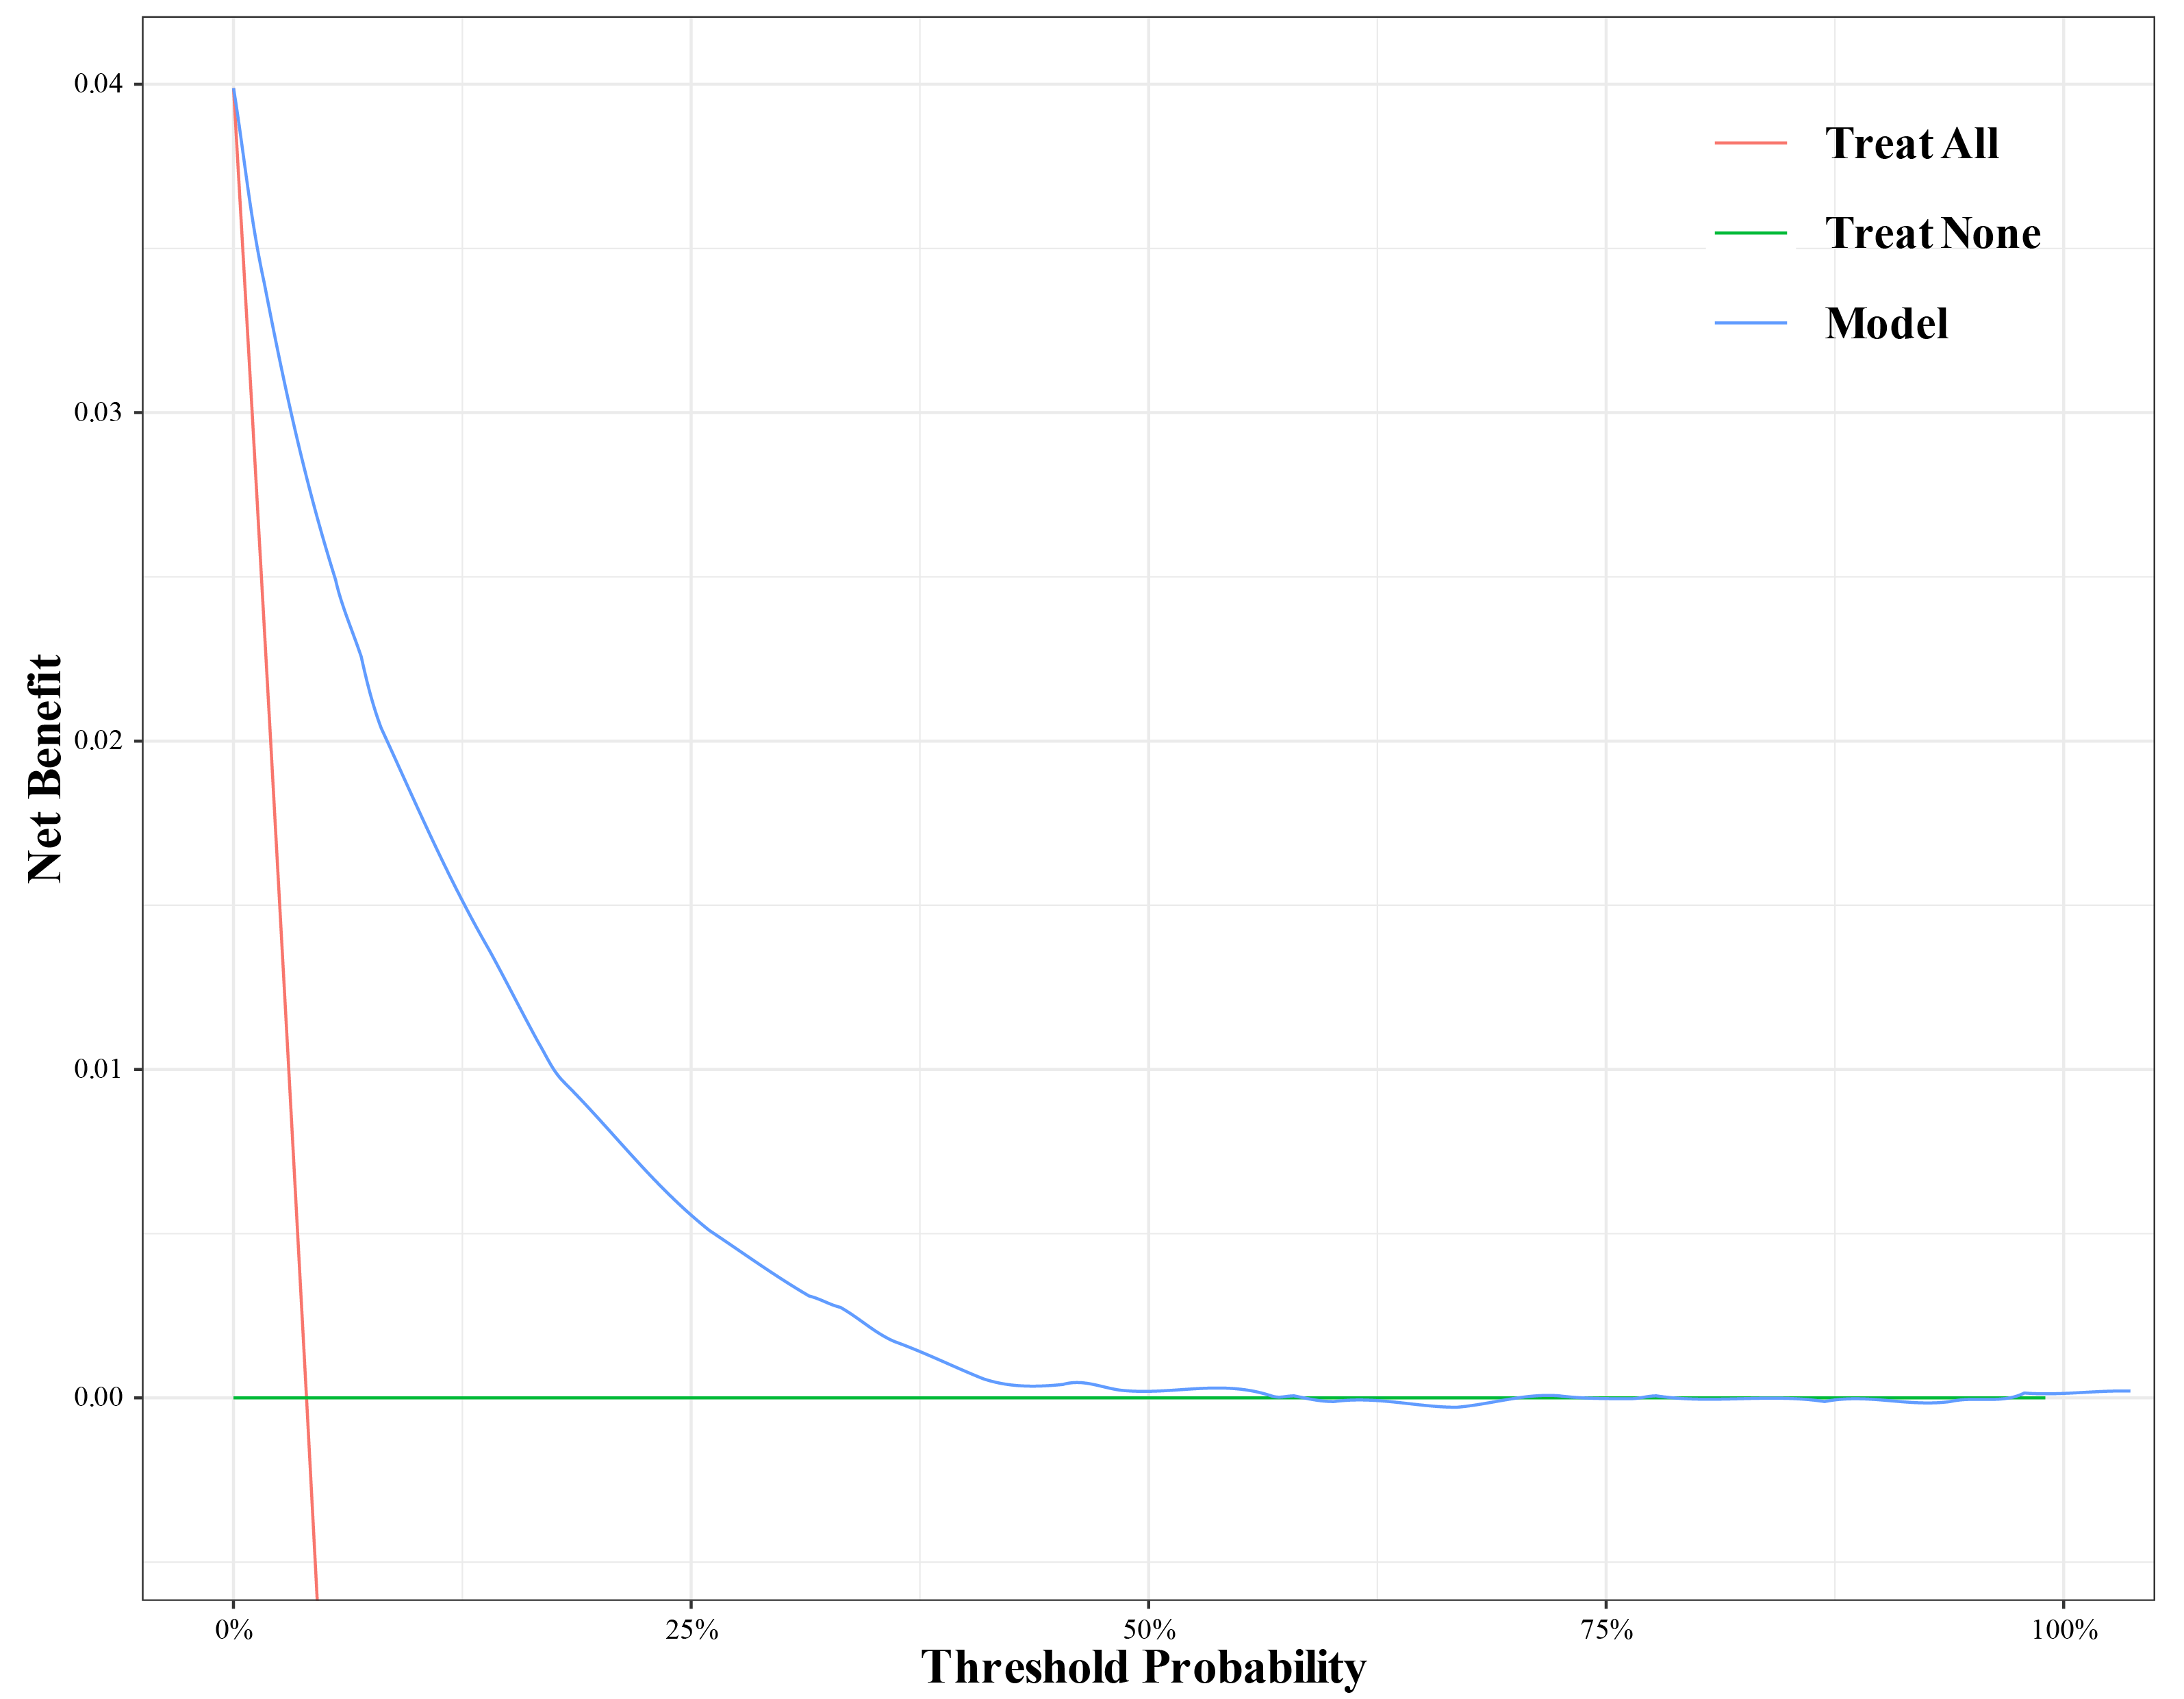


**Supplementary Figure 1** Decision curve analysis (DCA). The blue line indicates the net benefit of the predictive model. The green line indicates that the predictive model was not used.


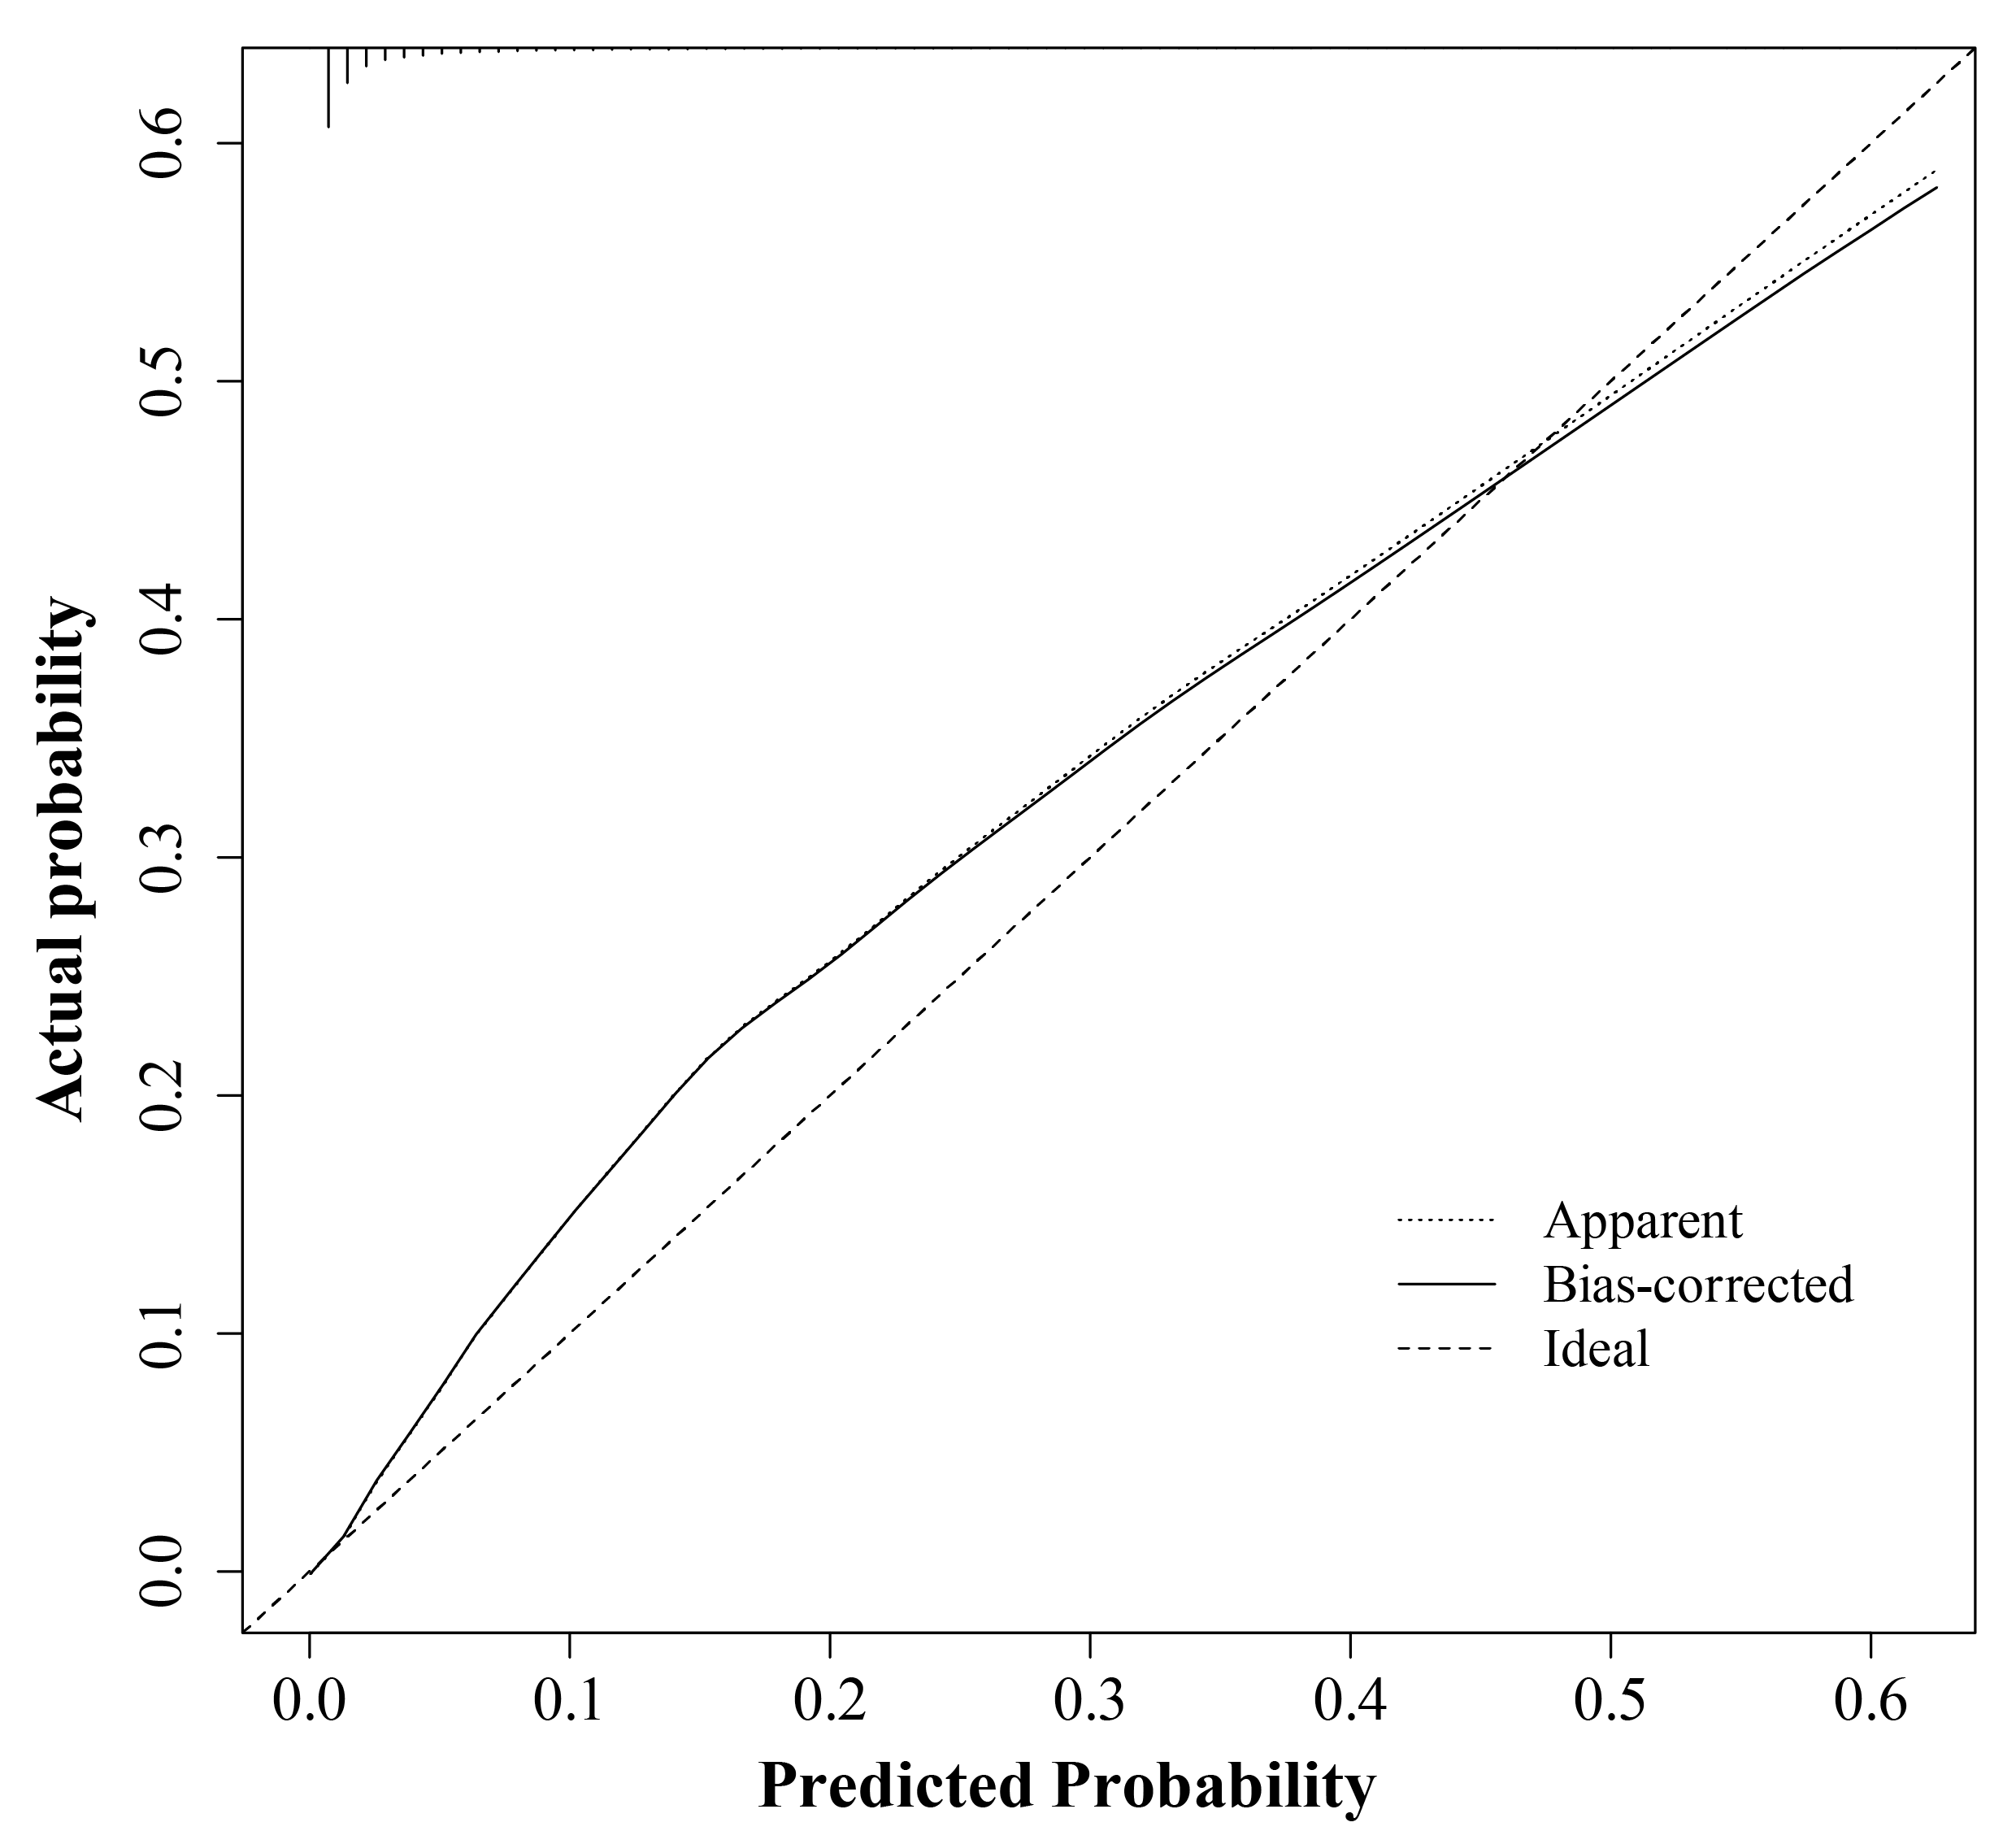


**Supplementary Figure 2** Calibration curves. Solid lines indicate bias-corrected predictions, gray dashed lines indicate apparent predictions and black dashed lines indicate ideal predictions.

**Supplementary Table 1** Lasso regression analysis results (log () = -5.2127).

| **Characteristic** | **r** | **Characteristic** | **r** |
| --- | --- | --- | --- |
| Gender | -9.5472 | Smoking status | -0.1289 |
| Age | 0.0495 | Alcohol consumption | / |
| Race | 0.3228 | Total cholesterol | -0.2560 |
| Marital status | / | Hypertension | 2.1229 |
| PIR | / | Diabetes | 0.2482 |
| Education level | / | Stroke | 6.1225 |
| BMI | / | Physical activity | / |

Abbreviation: PIR, poverty income ratio; BMI, body mass index.

**Supplementary Table 2** Diagnostic efficacy of CMI and the constructed prediction model for coronary heart disease.

|  | AUC (95%CI) | Accuracy (95%CI) | Sensitivity (95%CI) | Specificity (95%CI) | PPV (95%CI) | NPV (95%CI) | Cut off |
| --- | --- | --- | --- | --- | --- | --- | --- |
| CMI | 0.687 (0.668-0.707) | 0.724 (0.718-0.730) | 0.564 (0.531 - 0.598) | 0.731 (0.725 - 0.737) | 0.080 (0.073 - 0.087) | 0.976 (0.973 - 0.978) | 0.042 |
| Model | 0.861 (0.851-0.872) | 0.739 (0.733-0.745) | 0.844 (0.819 - 0.869) | 0.734 (0.728 - 0.740) | 0.117 (0.108 - 0.125) | 0.991 (0.990 - 0.993) | 0.036 |

The model is based on CMI, adjust for age, gender, smoking status, hypertension, stroke, total cholesterol.
